# Supplementary material for: Design features and elemental/metal analysis of the atomizers in pod-style electronic cigarettes
Source: PubMed Central journal article supplement (PMC7943009; doi:10.1371/journal.pone.0248127), 2021-03-09
Supplement: pone.0248127.s001.pdf [file pone.0248127.s001.pdf]

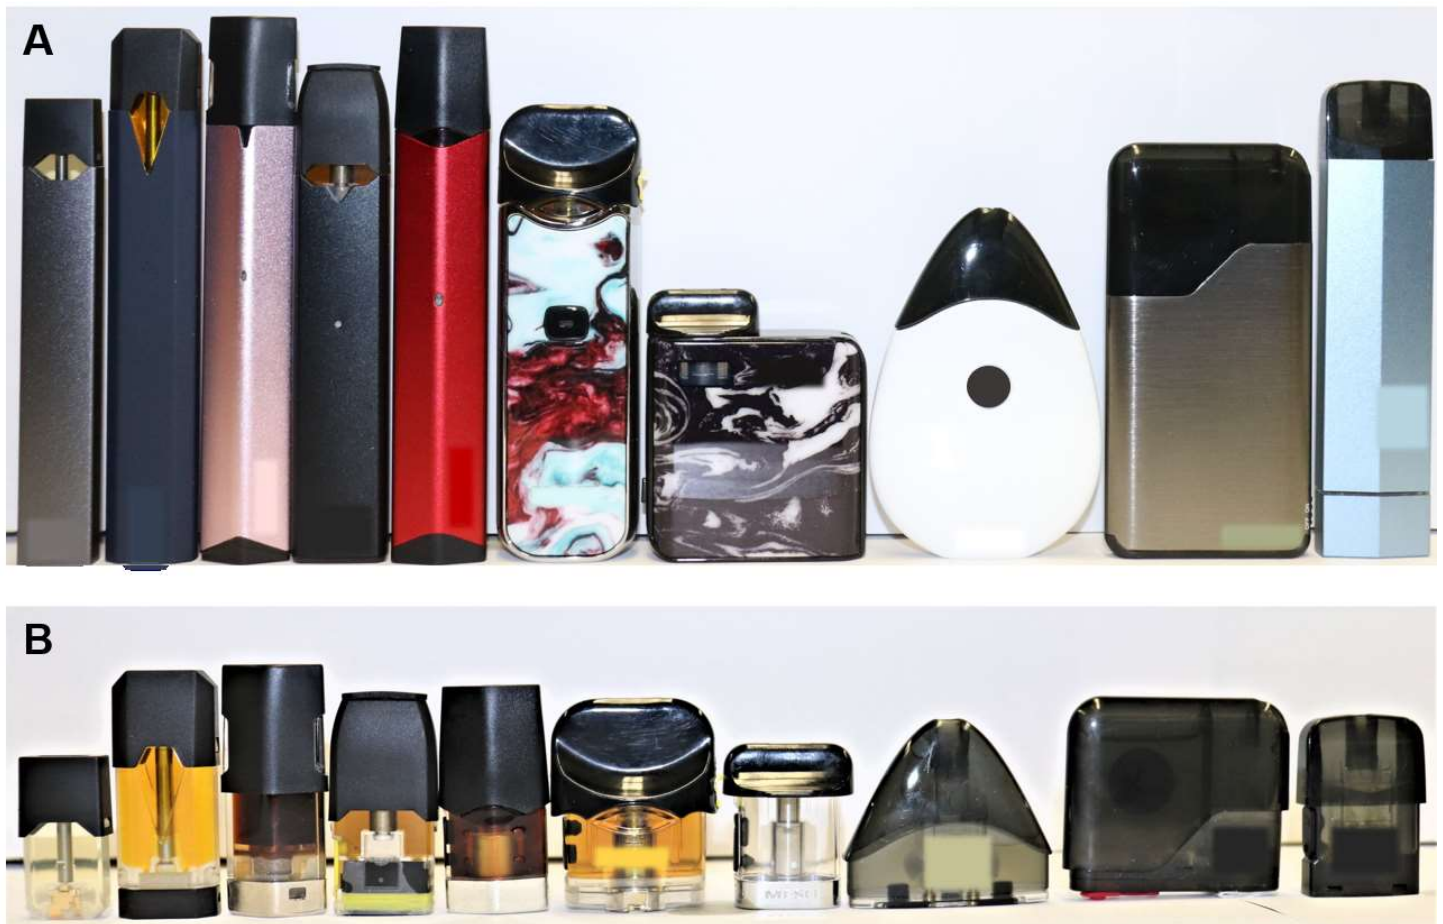

**S1 Fig. Fourth-generation pre-filled and refillable EC pod products.** (A) ready to use pod devices with batteries, and (B) pods only arranged by brand from left to right as follows; JUUL, KILO 1K, PHIX, KWIT Stick, SMOK Infinix, SMOK NORD, SMOK Mico, Suorin Drop, Suorin Air, and Suorin Edge. (TIF)
