# Supplementary material for: Design features and elemental/metal analysis of the atomizers in pod-style electronic cigarettes
Source: PubMed Central journal article supplement (PMC7943009; doi:10.1371/journal.pone.0248127), 2021-03-09
Supplement: pone.0248127.s002.pdf [file pone.0248127.s002.pdf]

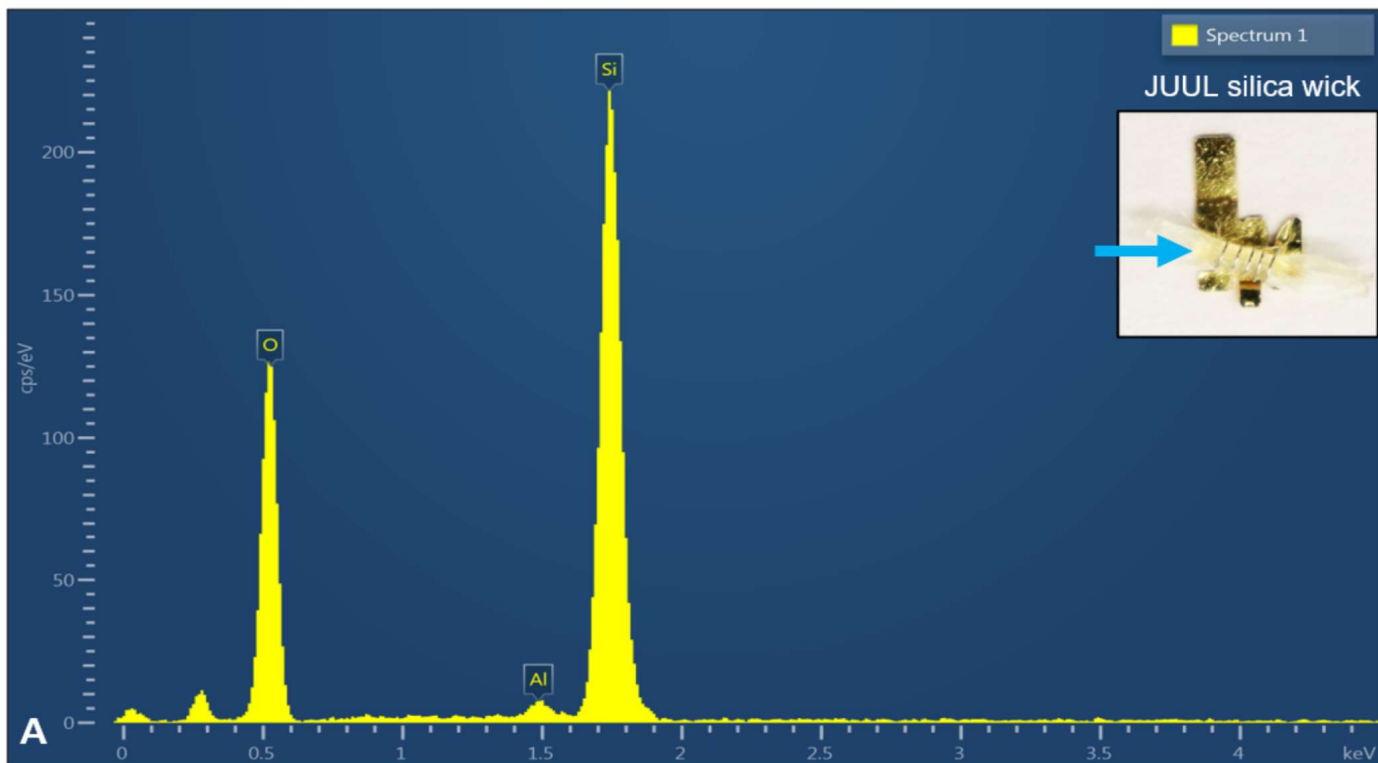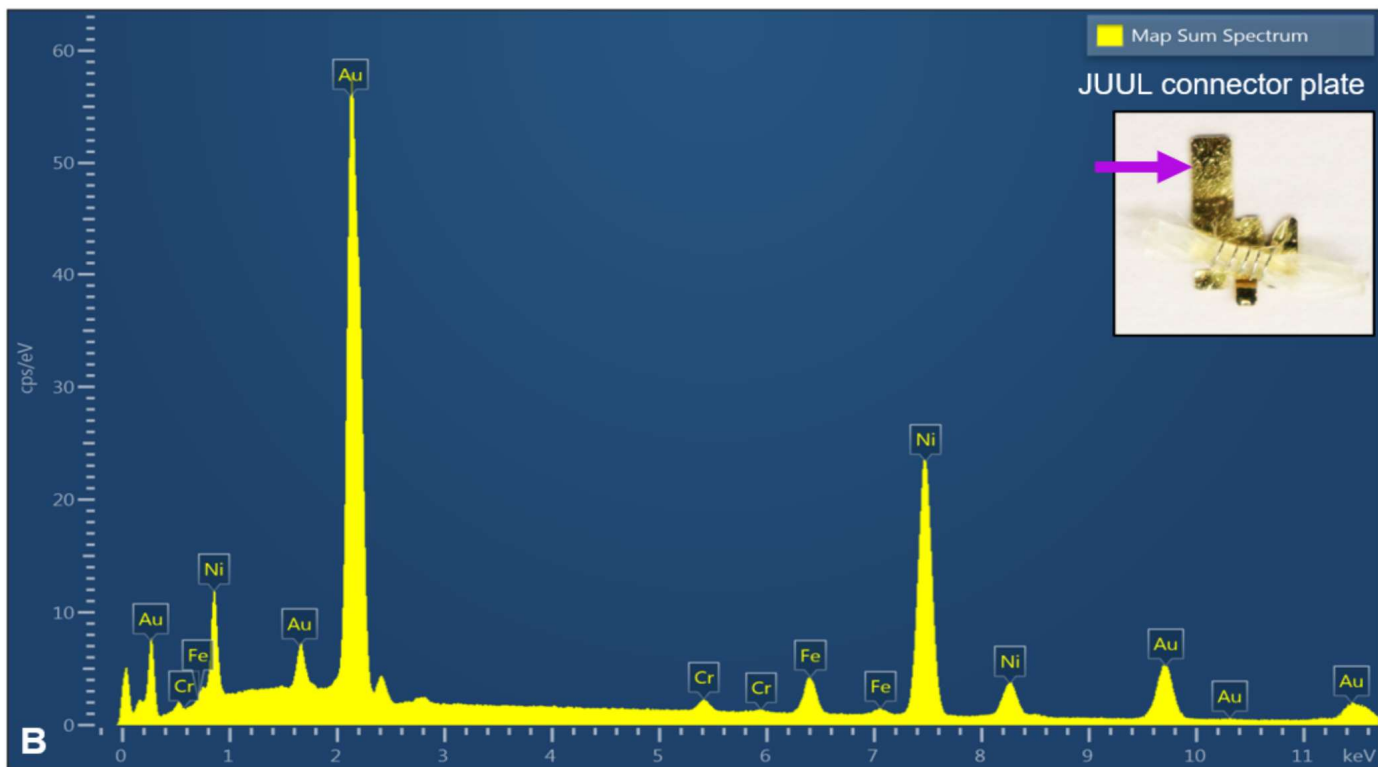

**S2 Fig. EDS spectra of JUUL atomizer components.** (A) wick, which comprises silicon and oxygen, and (B) the connector plate, mainly nickel coated with gold. The Blue arrow indicates the wick, and the purple arrow indicates the connector plate.
